# Supplementary material for: Speech Treatment for people with cerebellar Multiple System Atrophy (MSA-C): a pilot randomised controlled trial of two approaches.
Source: Research Square preprint supplement (doi:10.21203/rs.3.rs-6461331/v1), 2025-05-07
Supplement: Supplementary file 1 [file 6534495ffd41ce4f5b5e66f0.docx]

**Supplemental materials**

Scores for individual voice analysis categories (mean, SD) and Friedman test results for pre-/post-therapy comparisons

Scores:

| Task | GRBAS |  | CST | | | | ST | | | |
| --- | --- | --- | --- | --- | --- | --- | --- | --- | --- | --- |
|  |  |  | A1 | A2 | A3 | A4 | A1 | A2 | A3 | A4 |
| Sustained vowel | Grade | mean | 1.77 | 1.47 | 1.33 | 1.48 | 1.44 | 1.70 | 1.56 | 1.44 |
| sd | 0.90 | 0.68 | 0.71 | 0.75 | 0.75 | 0.91 | 0.89 | 0.80 |
| Roughness | mean | 1.33 | 1.17 | 1.13 | 1.11 | 1.04 | 1.33 | 1.19 | 1.22 |
| sd | 0.96 | 0.83 | 0.63 | 0.85 | 0.85 | 0.92 | 1.00 | 0.97 |
| Breathiness | mean | 0.53 | 0.43 | 0.60 | 0.44 | 0.07 | 0.19 | 0.19 | 0.15 |
| sd | 0.82 | 0.50 | 0.77 | 0.64 | 0.27 | 0.56 | 0.40 | 0.36 |
| Asthenia | mean | 0.90 | 0.93 | 0.73 | 0.44 | 0.56 | 0.78 | 0.48 | 0.52 |
| sd | 0.92 | 0.91 | 0.64 | 0.58 | 0.64 | 0.75 | 0.58 | 0.58 |
| Strain | mean | 0.70 | 0.63 | 0.47 | 0.41 | 0.89 | 0.93 | 0.74 | 0.85 |
| sd | 0.92 | 0.72 | 0.51 | 0.64 | 0.85 | 0.87 | 0.71 | 0.72 |
| Free speech | Grade | mean | 2.03 | 1.97 | 1.80 | 2.22 | 1.63 | 1.59 | 1.59 | 1.78 |
| sd | 0.76 | 0.72 | 0.71 | 0.80 | 0.79 | 0.80 | 0.64 | 0.75 |
| Roughness | mean | 1.47 | 1.57 | 1.50 | 1.74 | 1.30 | 1.07 | 1.30 | 1.30 |
| sd | 0.94 | 0.94 | 0.86 | 0.98 | 0.54 | 0.55 | 0.82 | 0.95 |
| Breathiness | mean | 0.83 | 0.80 | 0.97 | 1.00 | 0.48 | 0.48 | 0.41 | 0.78 |
| sd | 0.87 | 0.81 | 0.81 | 1.11 | 0.89 | 0.85 | 0.64 | 0.89 |
| Asthenia | mean | 1.20 | 1.20 | 0.97 | 1.41 | 0.89 | 0.81 | 0.78 | 1.26 |
| sd | 1.06 | 1.06 | 0.93 | 1.22 | 0.85 | 0.79 | 0.58 | 1.02 |
| Strain | mean | 1.17 | 1.23 | 0.83 | 1.52 | 0.89 | 1.00 | 0.78 | 0.78 |
| sd | 1.02 | 0.94 | 0.95 | 1.12 | 0.85 | 0.88 | 0.58 | 1.05 |

Friedman test results:

|  | Sustained vowel | | Free speech | |
| --- | --- | --- | --- | --- |
|  | CST | ST | CST | ST |
|  | p | p | p | p |
| Grade | 0.188 | 0.902 | 0.161 | 0.623 |
| Roughness | 0.640 | 0.360 | 0.497 | 0.365 |
| Asthenia | 0.819 | 0.477 | 0.156 | 0.560 |
| Breathiness | 0.984 | 0.300 | 0.407 | 0.364 |
| Strain | 0.622 | 0.705 | 0.055 | 0.812 |
